# Supplementary material for: A CRR2-Dependent sRNA Sequence Supports Papillomavirus Vaccine Expression in Tobacco Chloroplasts
Source: MDPI journal article supplement (doi:10.3390/metabo13030315), 2023-02-21
Supplement: s1 [file s1]

**Table S1.** Oligonucleotides used in this study.

| Name                     | Sequence                                       | Application                           |
|--------------------------|------------------------------------------------|---------------------------------------|
| <i>AndhB</i>             | GTCGTTGCTTTTCTTTCTG                            | Northern                              |
| <i>AT7ndhB</i>           | TAATACGACTCACTATAGGGAAATATAGGCCTGCCT           | Northern                              |
| <i>aadAfw1</i>           | GGAAACTTCGGCTTCCCCTGG                          | Northern,<br>sequencing               |
| <i>aadAT7</i>            | GTAATCGACTCACTATAGGGAACCGGATCAAAGAGT           | Northern                              |
| <i>HVP16B_forward</i>    | ATGGACCTGGACCTGGAATG                           | Northern,<br>sequencing               |
| <i>T7 HVP16B_reverse</i> | TAATACGACTCACTATAGGGCTCTTCCTACTTCTACTCCT       | Northern                              |
| <i>HVP182_forward</i>    | CTGCTGGAGGAGGAAATAAAC                          | Northern,<br>sequencing               |
| <i>T7 HVP182_reverse</i> | TAATACGACTCACTATAGGGGCAGGAGCACATCCTAAAAT<br>AC | Northern                              |
| <i>mR21</i>              | AGAACGTGGGTCTCCAAAAC                           | Southern                              |
| <i>mR35</i>              | TGGAATCGTGTTAGGTCTAATTCC                       | Southern                              |
| <i>bbfor</i>             | GATTTGTCGACATCAAGTTCG                          | cloning                               |
| <i>bbrev</i>             | ACAGGAGGACGTTCGTTTGC                           | cloning                               |
| <i>pHVP16rev</i>         | TTATTACAAGCTGGATTAAGC                          | cloning;<br>genotyping;<br>sequencing |
| <i>pHVP18rev</i>         | AAGCTGGATTAAGAAGAAAACC                         | cloning;<br>genotyping;<br>sequencing |
| <i>aadoutrev</i>         | ACTGCGGAGCCGTACAAATG                           | sequencing                            |
