# Supplementary material for: A CRR2-Dependent sRNA Sequence Supports Papillomavirus Vaccine Expression in Tobacco Chloroplasts
Source: MDPI journal article supplement (doi:10.3390/metabo13030315), 2023-02-21
Supplement: s1 [file s1]

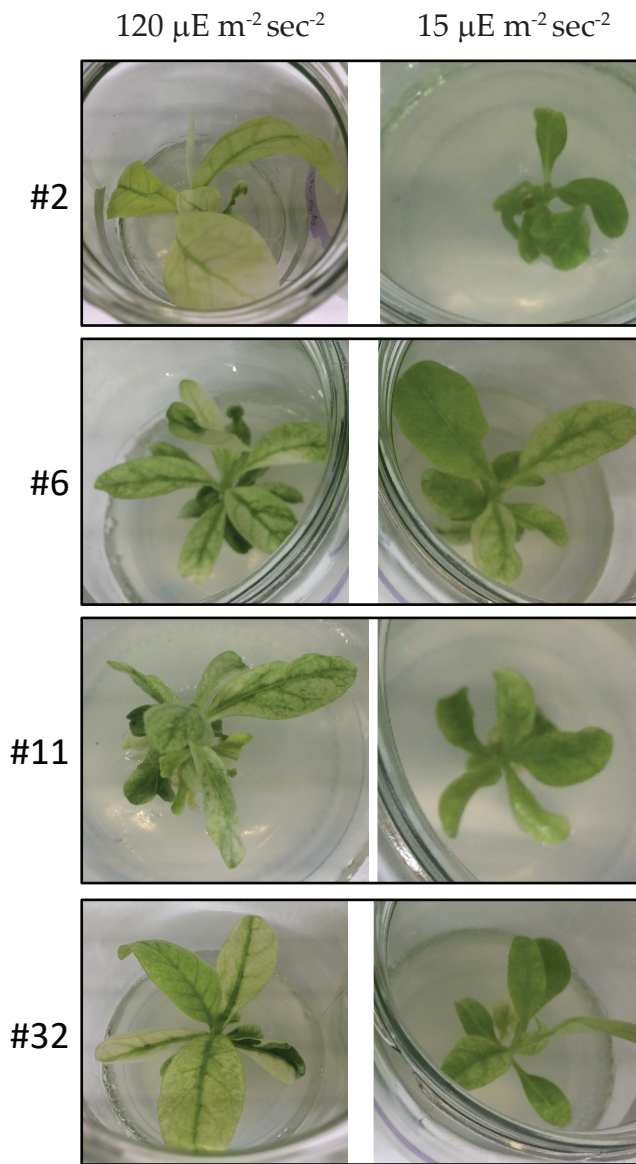

**Figure S1: Phenotype of *LTB::L1-HPV16B* plant lines grown under low light conditions.**

Plants were grown on sucrose-containing MS medium for three weeks either at 120  $\mu\text{E m}^{-2}\text{sec}^{-2}$  or at 15  $\mu\text{E m}^{-2}\text{sec}^{-2}$ .
